# Supplementary material for: Short- and Mid-Term Outcomes in Patients Deemed Inoperable Undergoing Transapical and Transfemoral TAVR with an STS-PROM below Four Percent
Source: MDPI journal article supplement (doi:10.3390/jcm10132993), 2021-07-05
Supplement: s1 [file s1]

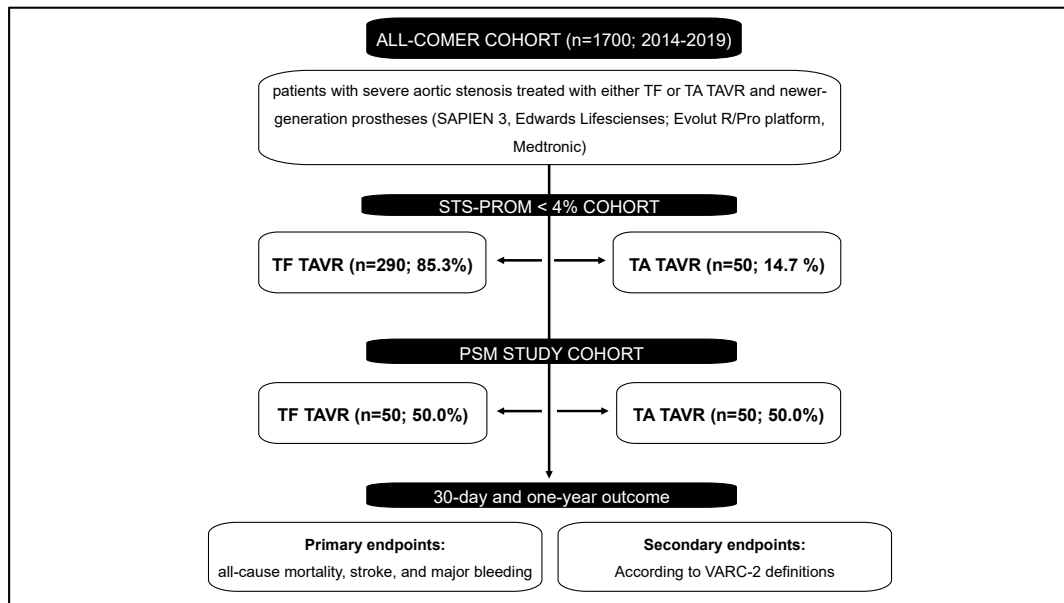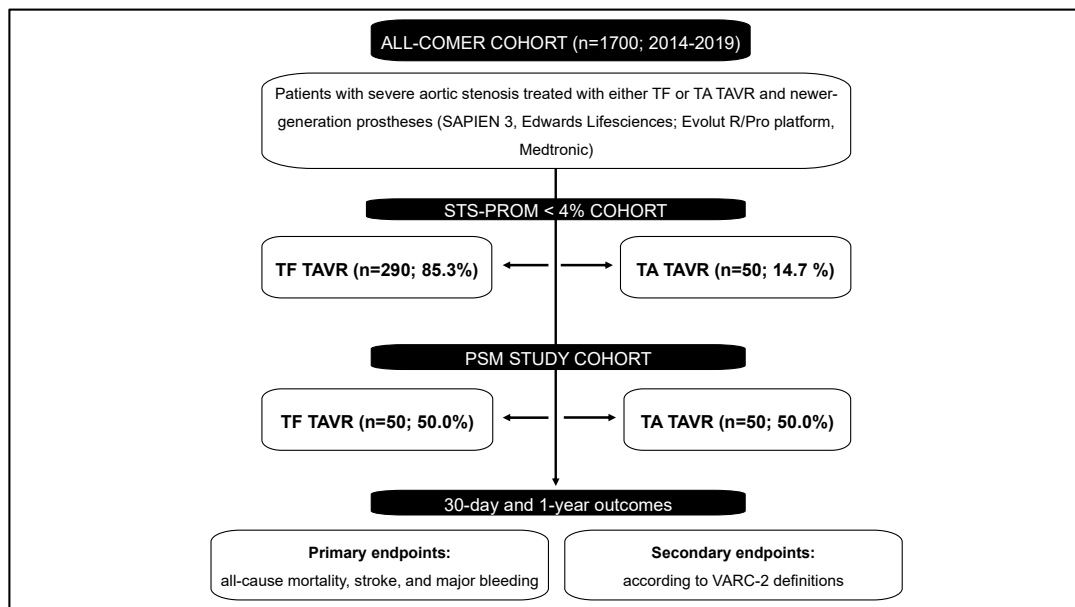

**Figure S1.** Flowchart of the study; PSM, propensity score matching.

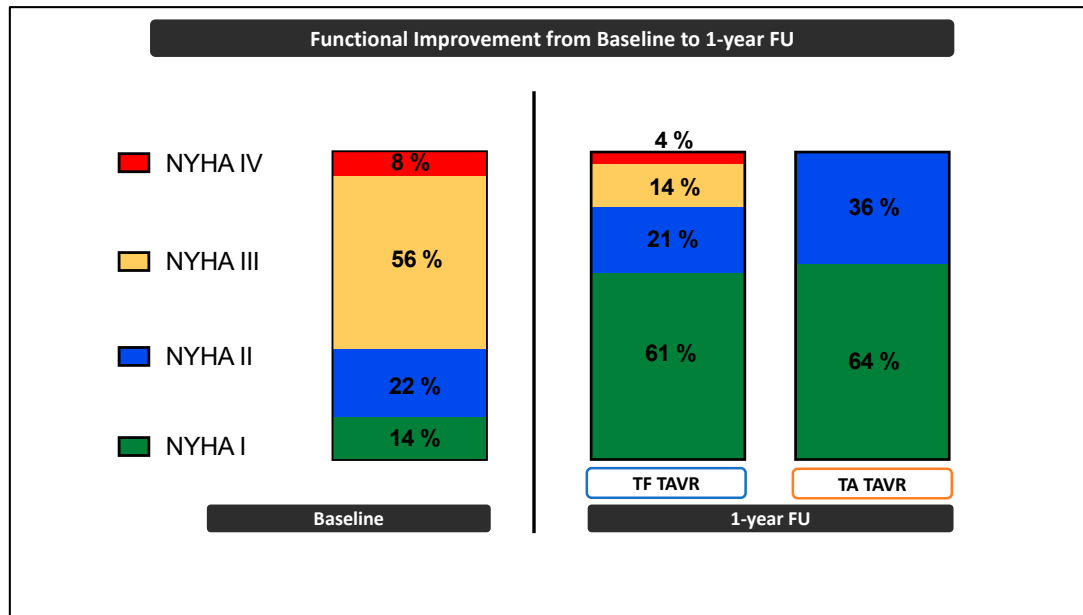

**Figure S2.** Functional improvement during 1-year follow-up (FU).

**Table S1.** Patient clinical and functional characteristics (propensity score-matched cohort).

| Clinical Data          | Overall<br>(n = 340) | TF<br>(n = 290) | TA<br>(n = 50) | p-Value  |
|------------------------|----------------------|-----------------|----------------|----------|
| Age, years             | 77.4 ± 7.2           | 78.1 ± 6.8      | 73.4 ± 8.3     | <0.001 * |
| Gender, male           | 202 (59.4)           | 161 (55.5)      | 41 (82.0)      | <0.001 * |
| BMI                    | 27.7 ± 4.9           | 27.7 ± 5.0      | 27.7 ± 4.6     | 0.986    |
| CAD                    | 230 (67.7)           | 193 (66.6)      | 37 (74.0)      | 0.298    |
| Previous PCI           | 104 (30.6)           | 89 (30.7)       | 15 (30.0)      | 0.922    |
| Previous CABG          | 48 (14.1)            | 35 (12.1)       | 13 (26.0)      | 0.009 *  |
| Previous valve         | 12 (3.5)             | 10 (3.5)        | 2 (4.0)        | 0.845    |
| Previous PPI           | 34 (10.0)            | 28 (9.7)        | 6 (12.0)       | 0.610    |
| Arterial hypertension  | 309 (90.9)           | 261 (90.0)      | 48 (96.0)      | 0.173    |
| PHT                    | 219 (64.4)           | 194 (66.9)      | 25 (50.0)      | 0.021 *  |
| Diabetes mellitus      | 87 (25.6)            | 72 (21.2)       | 15 (30.0)      | 0.099    |
| PAD                    | 81 (23.8)            | 52 (17.9)       | 29 (58.0)      | <0.001 * |
| CVD                    | 63 (18.5)            | 54 (18.6)       | 9 (18.0)       | 0.917    |
| Porcelain aorta        | 37 (10.9)            | 24 (12.0)       | 12 (24.0)      | 0.001 *  |
| Hostile aorta          | 64 (18.8)            | 56 (19.3)       | 8 (16.0)       | 0.580    |
| Previous RRT           | 1 (0.3)              | 1 (0.3)         | 0 (0.0)        | 0.678    |
| CKD                    | 131 (38.5)           | 116 (40.0)      | 15 (30.0)      | 0.180    |
| COPD                   | 80 (23.5)            | 67 (23.1)       | 13 (26.0)      | 0.656    |
| Frailty                | 72 (21.2)            | 59 (20.3)       | 13 (26.0)      | 0.366    |
| <b>Functional Data</b> |                      |                 |                |          |
| STS score, %           | 2.7 ± 0.8            | 2.7 ± 0.8       | 2.5 ± 0.9      | 0.230    |
| HAS-BLED score         | 2.9 ± 0.9            | 2.9 ± 0.9       | 2.8 ± 1.0      | 0.554    |
| LVEF, %                | 55.1 ± 11.5          | 55.4 ± 11.5     | 52.7 ± 11.7    | 0.373    |
| AVA, cm <sup>2</sup>   | 0.8 ± 0.2            | 0.8 ± 0.2       | 0.8 ± 0.2      | 0.318    |
| dPmax, mmHg            | 62.0 ± 23.3          | 61.5 ± 23.2     | 65.7 ± 23.9    | 0.306    |
| dPmean, mmHg           | 39.0 ± 15.9          | 38.4 ± 15.6     | 43.2 ± 17.7    | 0.087    |

\*  $p < 0.05$ ; values are means ± SD, medians ± interquartile range, or n (%). AVA, aortic valve area; BMI, body mass index; CABG, coronary artery bypass graft; CAD, coronary artery disease; COPD, chronic obstructive pulmonary disease; CVD, cerebrovascular disease; dPmean/max, mean/max. transvalvular gradient; LVEF, Left ventricular ejection fraction; PCI, percutaneous coronary

intervention; PHT, pulmonary hypertension; PAD, peripheral artery disease; PPI, permanent pacemaker implantation; RRT, renal replacement therapy.
